# Supplementary material for: Co-catalytic mechanism of Au and Ag in silicon etching to fabricate novel nanostructures
Source: Royal Society of Chemistry journal article supplement (doi:10.1039/c5ra19032k), 2015-01-01
Supplement: c5ra19032k1.pdf [file c5ra19032k1.pdf]

ARTICLE

## Co-catalytic mechanism of Au and Ag in silicon etching to fabricate novel nanostructures

Cite this: DOI:

Ruike Li,<sup>a</sup> Meicheng Li,<sup>\*ab</sup> Yingfeng Li,<sup>a</sup> Pengfei Fu,<sup>a</sup> Younan Luo,<sup>a</sup> Rui Huang,<sup>a</sup> Dandan Song<sup>a</sup> and Joseph Michel Mbengue<sup>a</sup>

DOI:

[www.rsc.org/](http://www.rsc.org/)

The following images are given to support the description ‘The inertia of Au can be directly verified by the fact that, after the etching process, the Au nanofilm can still be observed, as shown in the supplementary information.’ that arises in section ‘Etching feature using Ag and Au respectively’.

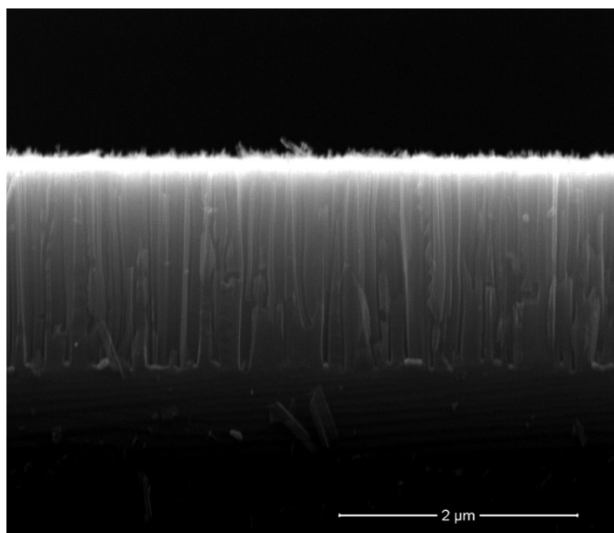

Fig. s1 SEM image of morphology catalytic etched by the Ag nanofilm for 5min. It reveals that there is no existence of the Ag nanofilm.

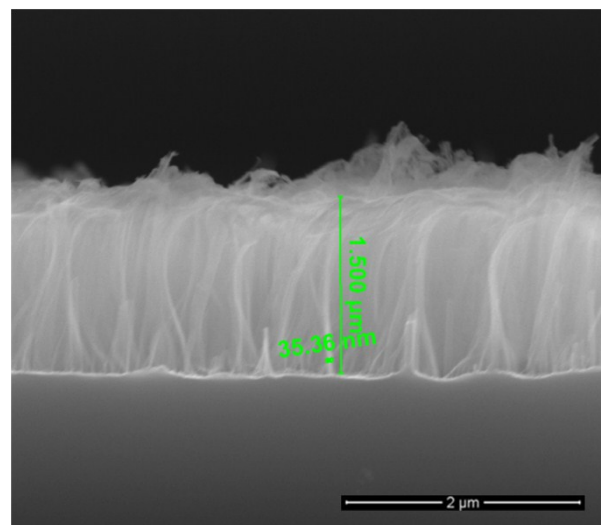

Fig. s2 SEM image of morphology catalytic etched by the Ag/Au nanofilm for 5min. It reveals that there is still existence of the Au nanofilm after the etching.

### Notes

<sup>a</sup> State Key Laboratory of Alternate Electrical Power System with Renewable Energy Sources, North China Electric Power University, Beijing, 102206, China.

E-mail: [mcli@ncepu.edu.cn](mailto:mcli@ncepu.edu.cn)

<sup>b</sup> Chongqing Materials Research Institute, Chongqing, 400707, China.
